# Supplementary material for: Growth and accelerated differentiation of mesenchymal stem cells on graphene oxide/poly-l-lysine composite films
Source: Royal Society of Chemistry journal article supplement (doi:10.1039/c4tb00856a), 2014-06-25
Supplement: c4tb00856a1.pdf [file c4tb00856a1.pdf]

Supplementary materials

**Growth and accelerated differentiation of mesenchymal stem cells on graphene oxide/poly-L-lysine composite films**

Wei Qi,\* Wenjing Yuan, Jing Yan, Hua Wang\*

Key Laboratory of Life-Organic Analysis, Key Laboratory of Pharmaceutical Intermediates and Analysis of Natural Medicine, School of Chemistry and Chemical Engineering, Qufu Normal University, 57 Jingxuan West Road, Qufu Shandong 273165 China

[\*] Corresponding author:

Dr. Wei Qi

E-mail: [qf\\_qw@163.com](mailto:qf_qw@163.com)

Tel: +86 537 4456301

Prof. Hua Wang

E-mail: [huawangqfnu@126.com](mailto:huawangqfnu@126.com)

Tel: +86 537 4456306

School of Chemistry and Chemical Engineering

Qufu Normal University, Qufu Shandong 273165 China

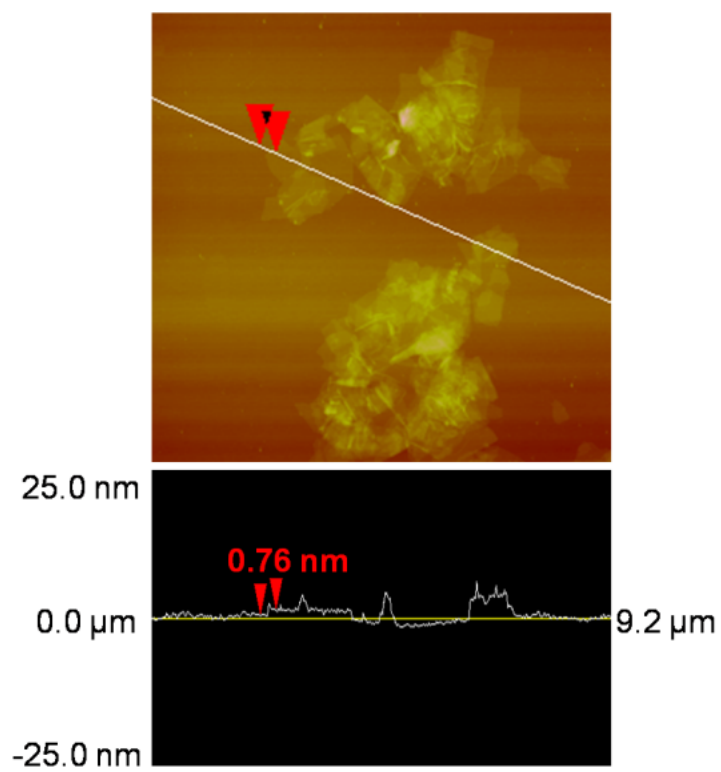

Fig. S1 The thickness of GO sheets determined by AFM technique of 0.76 nm.

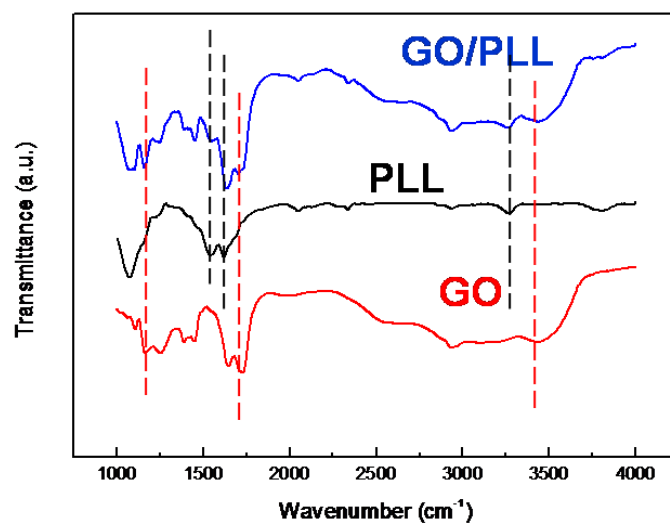

Fig. S2 FTIR spectra of GO, PLL and (GO/PLL)<sub>4</sub> film.

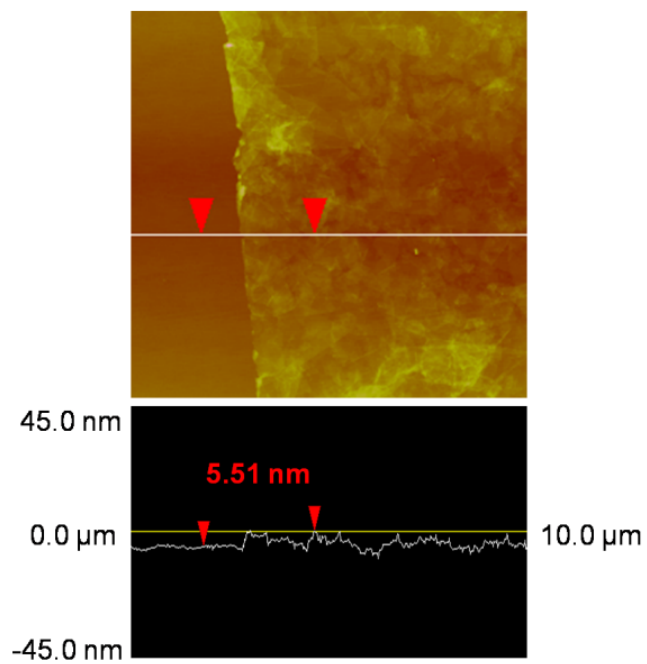

Fig. S3 The thickness of the  $(GO/PLL)_4$  film determined by AFM technique of 5.51 nm.

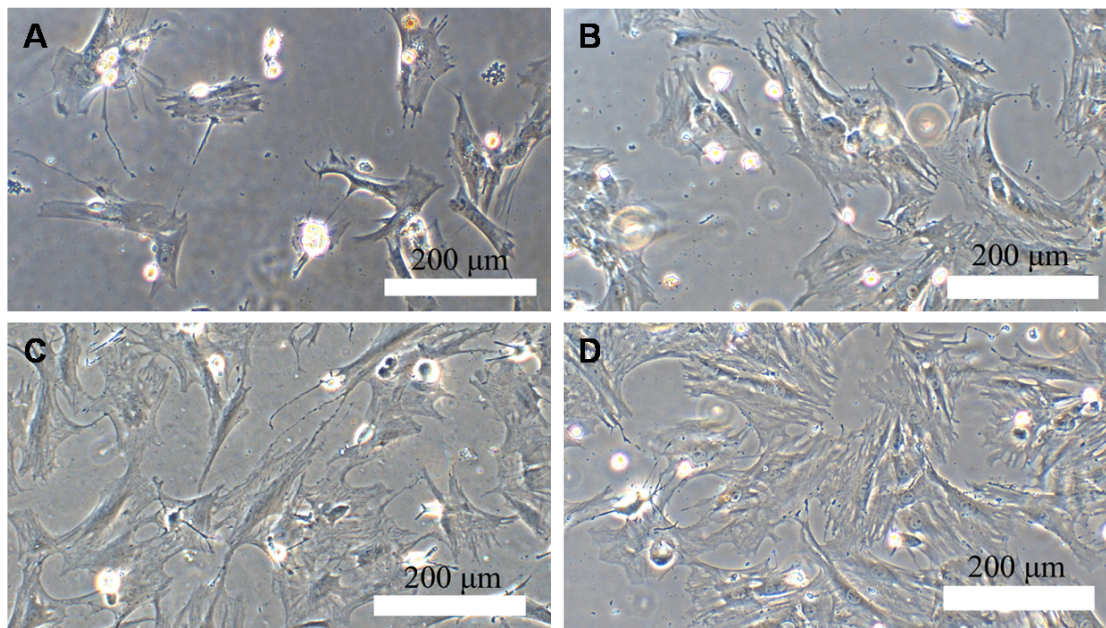

Fig. S4 Phase contrast images of MSCs cultured for 3 days on A) glass coverslips; B) GO-coverslips; C) PLL-coverslips; D) TCPS in normal cell culture media.

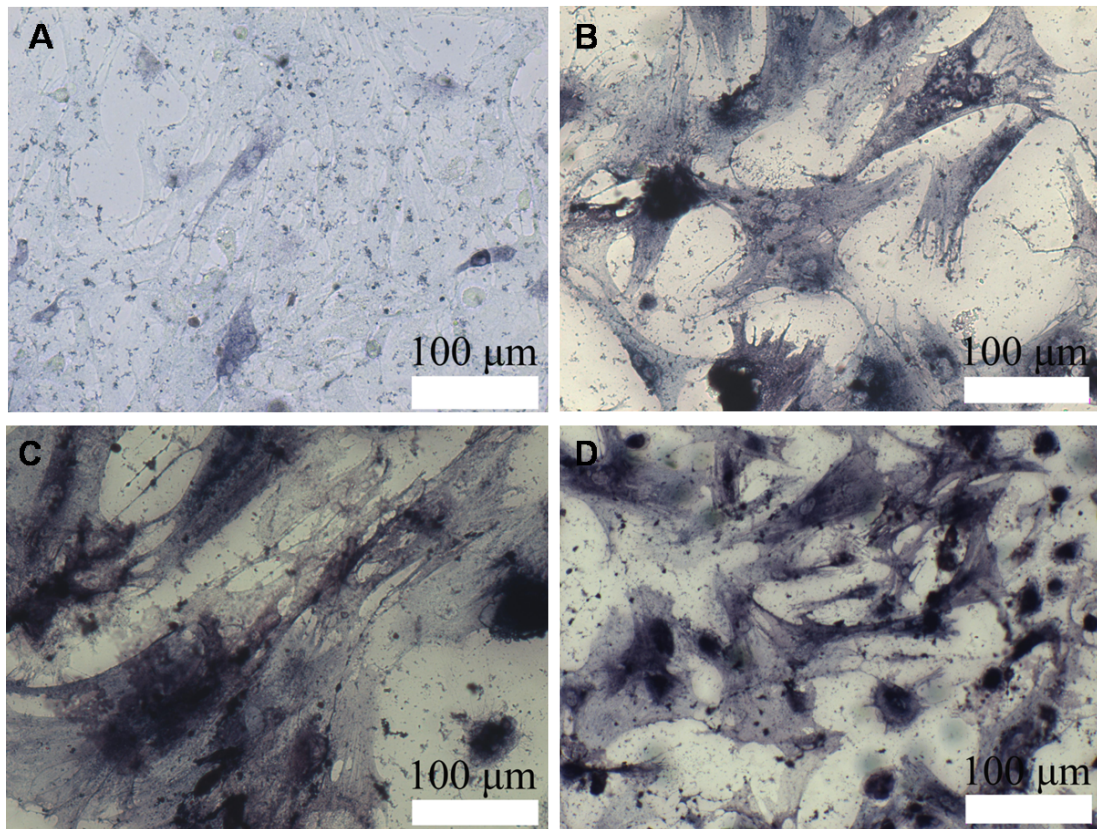

Fig. S5 ALP staining results of MSCs on A) glass coverslips; B) GO-coverslips; C) PLL-coverslips; D) TCPS on the 7<sup>th</sup> day of differentiation.

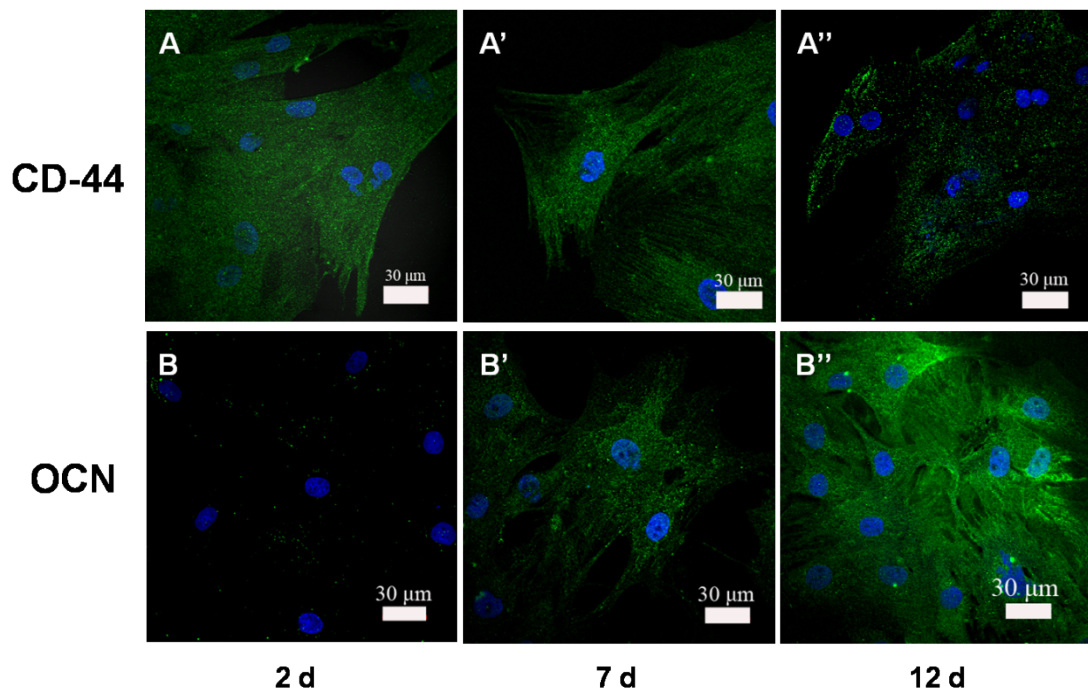

Fig. S6 Immunostaining of cells growing on the TCPS were performed from 2 days to 12 days. Cells are stained with DAPI (blue) and CD-44 or osteocalcin (OCN) as indicated (green). (A, A', A'') CD-44, marker for stem cells. (B, B', B'') OCN, marker for osteoblasts.

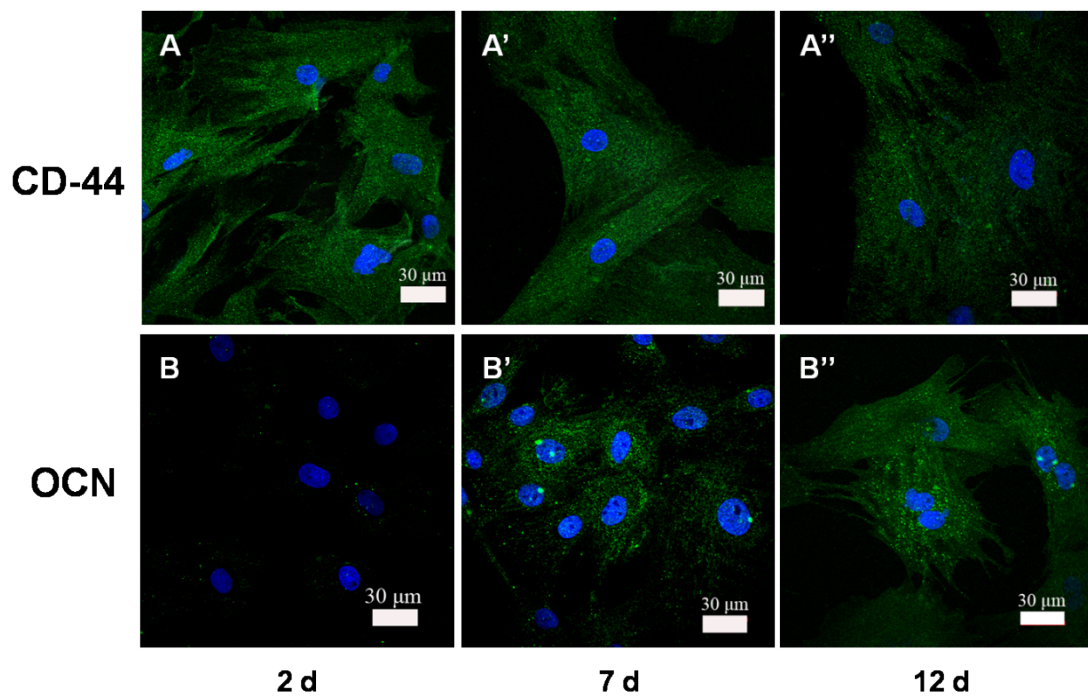

Fig. S7 Immunostaining of cells growing on the blank coverslips were performed from 2 days to 12 days. Cells are stained with DAPI (blue) and CD-44 or osteocalcin (OCN) as indicated (green). (A, A', A'') CD-44, marker for stem cells. (B, B', B'') OCN, marker for osteoblasts.



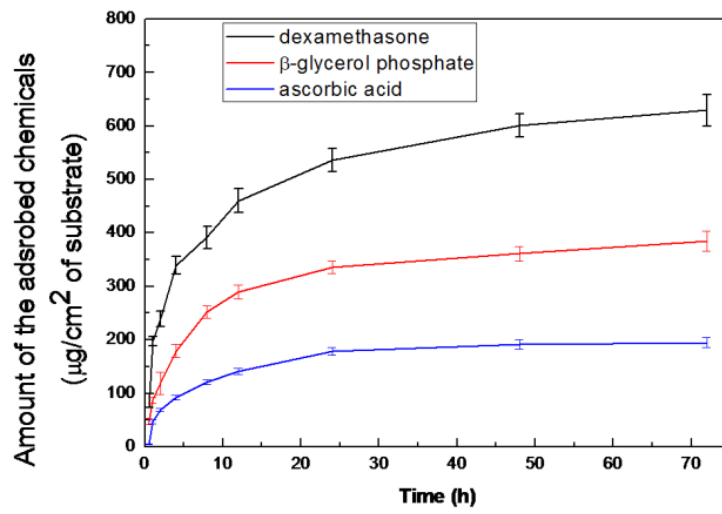

Fig. S8 Adsorption kinetics of dexamethasone,  $\beta$ -glycerol phosphate, and ascorbic acid on the (GO/PLL)<sub>4</sub> films. The three systems were all in concentration of 10 mM in PBS.
